# Supplementary material for: Spatial variability of herbicide mobilisation and transport at catchment scale: insights from a field experiment
Source: Copernicus journal article supplement (doi:10.5194/hess-16-1947-2012), 2012-07-06
Supplement: Supplementary file 1 [file hess-16-1947-2012-supplement.pdf]

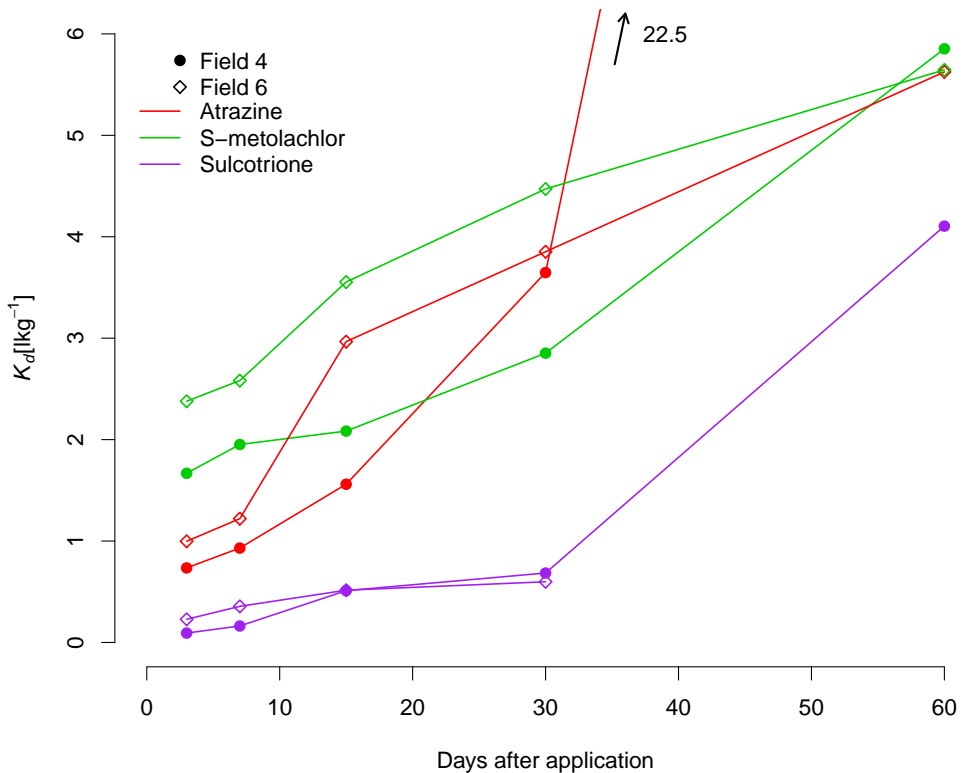

**Fig. S1.**  $K_d$  values for three substances on two experimental fields over two month after application.  $K_d$  of atrazine on field 4 at day 60 is  $22.5 \text{ l kg}^{-1}$ ; pore water concentration of sulcotrione on field 6 at day 60 was below detection limit.

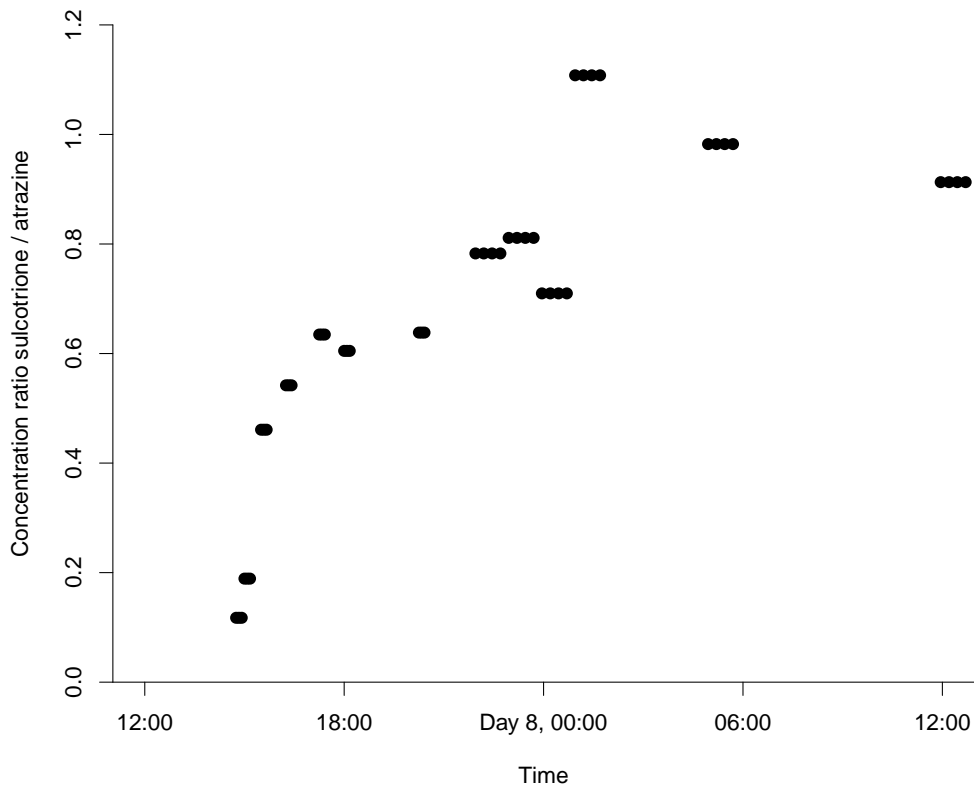

**Fig. S2.** Concentration ratio sulcotrione / atrazine at station  $O_u$  during event E2 (26 June 2009, seven days after application).
